# Supplementary material for: A Novel Lipid Prognostic Signature of ADCY2, LIPE, and OLR1 in Head and Neck Squamous Cell Carcinoma
Source: Front Oncol. 2021 Nov 25;11:735993. doi: 10.3389/fonc.2021.735993 (PMC8655234; doi:10.3389/fonc.2021.735993)
Supplement: File S2 — List of protein–protein interaction (PPI) results from 65 lipid DEGs and two key modules within the PPI. [file DataSheet_2.xlsx]

## Sheet: string_interactions
node1	node2	node1_string_internal_id	node2_string_internal_id	node1_external_id	node2_external_id	neighborhood_on_chromosome	gene_fusion	phylogenetic_cooccurrence	homology	coexpression	experimentally_determined_interaction	database_annotated	automated_textmining	combined_score
ADIPOQ	PPARG	4447630	4436745	9606.ENSP00000389814	9606.ENSP00000287820	0	0	0	0	0.063	0	0.9	0.943	0.994
PLIN1	LIPE	4437623	4433889	9606.ENSP00000300055	9606.ENSP00000244289	0	0	0	0	0.134	0.379	0.9	0.912	0.994
PLIN1	PPARG	4437623	4436745	9606.ENSP00000300055	9606.ENSP00000287820	0	0	0	0	0.063	0	0.9	0.834	0.983
CYP2E1	ADH1B	4449959	4438237	9606.ENSP00000440689	9606.ENSP00000306606	0.043	0	0	0	0.128	0	0.9	0.732	0.974
SLC2A4	PPARG	4439402	4436745	9606.ENSP00000320935	9606.ENSP00000287820	0	0	0	0	0.061	0	0.9	0.736	0.973
LPCAT1	CHPT1	4436543	4433454	9606.ENSP00000283415	9606.ENSP00000229266	0	0	0	0	0	0	0.9	0.73	0.971
EPHX2	CYP2J2	4449539	4443694	9606.ENSP00000430269	9606.ENSP00000360247	0.056	0	0	0	0.078	0.081	0.9	0.657	0.967
SPHK1	ACER1	4438875	4437759	9606.ENSP00000313681	9606.ENSP00000301452	0	0	0	0	0.06	0.129	0.9	0.592	0.962
CYP2E1	ADH7	4449959	4449104	9606.ENSP00000440689	9606.ENSP00000420269	0.043	0	0	0	0.087	0	0.9	0.515	0.952
DEGS2	ACER1	4438285	4437759	9606.ENSP00000307126	9606.ENSP00000301452	0	0	0	0	0.064	0	0.9	0.494	0.948
PLA2G16	CHPT1	4439356	4433454	9606.ENSP00000320337	9606.ENSP00000229266	0	0	0	0	0	0	0.9	0.478	0.945
FABP3	LIPE	4444252	4433889	9606.ENSP00000362817	9606.ENSP00000244289	0	0	0	0	0	0.081	0.9	0.421	0.942
GNAI1	ADCY2	4441302	4441294	9606.ENSP00000343027	9606.ENSP00000342952	0	0	0	0	0.062	0.184	0.9	0.332	0.942
SPHK1	DEGS2	4438875	4438285	9606.ENSP00000313681	9606.ENSP00000307126	0	0	0	0	0	0	0.9	0.443	0.941
GNAI1	ADCY3	4441302	4434792	9606.ENSP00000343027	9606.ENSP00000260600	0	0	0	0	0.062	0.184	0.9	0.241	0.934
DHCR7	SQLE	4441750	4435659	9606.ENSP00000347717	9606.ENSP00000265896	0	0	0	0	0.47	0.368	0	0.804	0.929
CYP11A1	SULT2B1	4435799	4432786	9606.ENSP00000268053	9606.ENSP00000201586	0	0	0	0	0.061	0	0.9	0.286	0.927
CYP3A5	SULT2B1	4433259	4432786	9606.ENSP00000222982	9606.ENSP00000201586	0	0	0	0	0.052	0	0.9	0.259	0.923
CYP2J2	ALOX12	4443694	4434179	9606.ENSP00000360247	9606.ENSP00000251535	0	0	0	0	0	0	0.9	0.251	0.921
HSD17B6	CYP3A5	4450358	4433259	9606.ENSP00000451406	9606.ENSP00000222982	0	0	0	0	0.066	0.064	0.9	0.213	0.921
ADCY2	ADCY3	4441294	4434792	9606.ENSP00000342952	9606.ENSP00000260600	0	0	0	0.835	0.061	0	0.9	0.867	0.916
CYP2E1	SULT2B1	4449959	4432786	9606.ENSP00000440689	9606.ENSP00000201586	0	0	0	0	0	0	0.9	0.153	0.911
CYP2E1	CYP2J2	4449959	4443694	9606.ENSP00000440689	9606.ENSP00000360247	0	0	0.437	0.898	0.063	0	0.9	0.595	0.911
CYP2E1	ALOX12	4449959	4434179	9606.ENSP00000440689	9606.ENSP00000251535	0	0	0	0	0	0	0.9	0.138	0.91
LPCAT1	PLA2G7	4436543	4436162	9606.ENSP00000283415	9606.ENSP00000274793	0	0	0	0	0.061	0	0.8	0.56	0.91
PPAPDC1A	CHPT1	4446797	4433454	9606.ENSP00000381302	9606.ENSP00000229266	0	0	0	0	0.061	0.064	0.9	0.067	0.907
CH25H	DHCR7	4443826	4441750	9606.ENSP00000360918	9606.ENSP00000347717	0	0	0	0	0.112	0.313	0.8	0.324	0.906
PLA2G16	LPCAT1	4439356	4436543	9606.ENSP00000320337	9606.ENSP00000283415	0	0	0	0	0	0	0.9	0.057	0.901
TM7SF2	SQLE	4436343	4435659	9606.ENSP00000279263	9606.ENSP00000265896	0	0	0	0	0.092	0.457	0	0.817	0.901
DHCR7	CYP11A1	4441750	4435799	9606.ENSP00000347717	9606.ENSP00000268053	0	0	0	0	0.049	0.168	0.8	0.423	0.896
HSD17B6	CYP11A1	4450358	4435799	9606.ENSP00000451406	9606.ENSP00000268053	0	0	0	0	0	0.064	0	0.891	0.893
PLA2G2A	PLA2G7	4447011	4436162	9606.ENSP00000383364	9606.ENSP00000274793	0	0	0	0	0	0	0.65	0.67	0.879
GPD1	GPD1L	4437724	4436498	9606.ENSP00000301149	9606.ENSP00000282541	0	0	0.448	0.976	0.066	0.346	0.8	0.711	0.87
SPHK1	CERS2	4438875	4435990	9606.ENSP00000313681	9606.ENSP00000271688	0	0	0	0	0.077	0	0.65	0.615	0.865
PLA2G2A	ALOX12	4447011	4434179	9606.ENSP00000383364	9606.ENSP00000251535	0	0	0	0	0.06	0.294	0.65	0.456	0.856
PLA2G2A	PLA2G16	4447011	4439356	9606.ENSP00000383364	9606.ENSP00000320337	0	0	0	0	0.055	0	0.65	0.587	0.851
CH25H	SQLE	4443826	4435659	9606.ENSP00000360918	9606.ENSP00000265896	0.048	0	0	0	0.479	0.392	0	0.562	0.85
PCSK9	SORT1	4437942	4434501	9606.ENSP00000303208	9606.ENSP00000256637	0	0	0	0	0.079	0	0	0.837	0.843
PLIN4	PLIN1	4437742	4437623	9606.ENSP00000301286	9606.ENSP00000300055	0	0	0	0	0.231	0	0	0.8	0.84
HMGCS2	SQLE	4443311	4435659	9606.ENSP00000358414	9606.ENSP00000265896	0	0	0	0	0.544	0	0	0.661	0.838
DEGS2	CERS2	4438285	4435990	9606.ENSP00000307126	9606.ENSP00000271688	0	0	0	0	0.061	0	0.65	0.513	0.826
ADIPOQ	SLC2A4	4447630	4439402	9606.ENSP00000389814	9606.ENSP00000320935	0	0	0	0	0.091	0	0	0.805	0.815
APOC2	PLA2G7	4450821	4436162	9606.ENSP00000466775	9606.ENSP00000274793	0	0	0	0	0	0	0.72	0.362	0.814
DHCR7	SULT2B1	4441750	4432786	9606.ENSP00000347717	9606.ENSP00000201586	0	0	0	0	0	0	0.8	0.092	0.81
PPAPDC1A	GPD1	4446797	4437724	9606.ENSP00000381302	9606.ENSP00000301149	0	0	0	0	0	0	0.8	0.08	0.808
SLC2A1	SLC2A4	4448824	4439402	9606.ENSP00000416293	9606.ENSP00000320935	0	0	0.449	0.968	0	0	0.8	0.92	0.808
PPAPDC1A	GPD1L	4446797	4436498	9606.ENSP00000381302	9606.ENSP00000282541	0	0	0	0	0	0	0.8	0.08	0.808
PLA2G16	PLA2G7	4439356	4436162	9606.ENSP00000320337	9606.ENSP00000274793	0	0	0	0	0	0	0.65	0.445	0.797
MGLL	LIPE	4435543	4433889	9606.ENSP00000265052	9606.ENSP00000244289	0.111	0	0	0	0	0	0	0.768	0.785
ADIPOQ	PLIN1	4447630	4437623	9606.ENSP00000389814	9606.ENSP00000300055	0	0	0	0	0.367	0	0	0.67	0.782
PLA2G2A	LPCAT1	4447011	4436543	9606.ENSP00000383364	9606.ENSP00000283415	0	0	0	0	0	0	0.65	0.311	0.748
ADIPOQ	LIPE	4447630	4433889	9606.ENSP00000389814	9606.ENSP00000244289	0	0	0	0	0.062	0	0	0.731	0.737
PLIN5	LIPE	4445607	4433889	9606.ENSP00000371272	9606.ENSP00000244289	0	0	0	0	0	0.305	0	0.633	0.734
PPARG	LIPE	4436745	4433889	9606.ENSP00000287820	9606.ENSP00000244289	0	0	0	0	0.061	0.077	0	0.701	0.718
GDPD3	PLA2G16	4447108	4439356	9606.ENSP00000384363	9606.ENSP00000320337	0	0	0	0	0	0	0.65	0.2	0.708
DHCR7	CYP27B1	4441750	4433420	9606.ENSP00000347717	9606.ENSP00000228606	0	0	0	0	0.049	0.168	0	0.656	0.704
PPARG	SCARB1	4436745	4434927	9606.ENSP00000287820	9606.ENSP00000261693	0	0	0	0	0.061	0	0	0.683	0.689
SLC2A4	LIPE	4439402	4433889	9606.ENSP00000320935	9606.ENSP00000244289	0	0	0	0	0.061	0	0	0.681	0.687
PLA2G2A	CYP2J2	4447011	4443694	9606.ENSP00000383364	9606.ENSP00000360247	0	0	0	0	0.065	0	0.65	0.119	0.686
SLC2A4	SORT1	4439402	4434501	9606.ENSP00000320935	9606.ENSP00000256637	0	0	0	0	0.062	0.051	0	0.671	0.681
CYP2E1	PLA2G2A	4449959	4447011	9606.ENSP00000440689	9606.ENSP00000383364	0	0	0	0	0	0	0.65	0.111	0.675
OLR1	SCARB1	4438475	4434927	9606.ENSP00000309124	9606.ENSP00000261693	0	0	0	0	0	0	0	0.669	0.669
PLA2G2A	CHPT1	4447011	4433454	9606.ENSP00000383364	9606.ENSP00000229266	0	0	0	0	0	0	0.65	0.092	0.668
PLA2G7	CHPT1	4436162	4433454	9606.ENSP00000274793	9606.ENSP00000229266	0	0	0	0	0.062	0	0.65	0.056	0.663
GPX3	CYP2J2	4445798	4443694	9606.ENSP00000373477	9606.ENSP00000360247	0	0	0	0	0.055	0	0.65	0.062	0.662
CYP2J2	GPX7	4443694	4442517	9606.ENSP00000360247	9606.ENSP00000354677	0	0	0	0	0	0	0.65	0.062	0.657
GPX8	CYP2J2	4449266	4443694	9606.ENSP00000423822	9606.ENSP00000360247	0	0	0	0	0	0	0.65	0.062	0.657
PLIN1	MGLL	4437623	4435543	9606.ENSP00000300055	9606.ENSP00000265052	0	0	0	0	0.062	0	0	0.65	0.657
CYP2J2	PLA2G16	4443694	4439356	9606.ENSP00000360247	9606.ENSP00000320337	0	0	0	0	0	0	0.65	0.053	0.654
PLA2G16	ALOX12	4439356	4434179	9606.ENSP00000320337	9606.ENSP00000251535	0	0	0	0	0	0	0.65	0.05	0.653
FABP3	SLC27A6	4444252	4435090	9606.ENSP00000362817	9606.ENSP00000262462	0	0	0	0	0.06	0	0	0.646	0.653
CYP2E1	PLA2G16	4449959	4439356	9606.ENSP00000440689	9606.ENSP00000320337	0	0	0	0	0	0	0.65	0	0.65
GDPD3	PLA2G2A	4447108	4447011	9606.ENSP00000384363	9606.ENSP00000383364	0	0	0	0	0	0	0.65	0	0.65
SLC16A1	SLC2A1	4449975	4448824	9606.ENSP00000441065	9606.ENSP00000416293	0	0	0	0	0.097	0	0	0.62	0.642
CYP11A1	SCARB1	4435799	4434927	9606.ENSP00000268053	9606.ENSP00000261693	0	0	0	0	0.061	0	0	0.623	0.631
PIK3CD	GNAI1	4444876	4441302	9606.ENSP00000366563	9606.ENSP00000343027	0	0	0	0	0	0.085	0.6	0.059	0.625
ACER1	CERS2	4437759	4435990	9606.ENSP00000301452	9606.ENSP00000271688	0	0	0	0	0	0.173	0	0.54	0.603
SCD5	PPARG	4439049	4436745	9606.ENSP00000316329	9606.ENSP00000287820	0	0	0	0	0	0	0	0.598	0.598
HMGCS2	DHCR7	4443311	4441750	9606.ENSP00000358414	9606.ENSP00000347717	0	0	0	0	0.226	0	0	0.496	0.593
PLIN4	LIPE	4437742	4433889	9606.ENSP00000301286	9606.ENSP00000244289	0	0	0	0	0.095	0	0	0.567	0.591
FABP3	PPARG	4444252	4436745	9606.ENSP00000362817	9606.ENSP00000287820	0	0	0	0	0	0.064	0	0.579	0.589
SLC2A4	SLC27A6	4439402	4435090	9606.ENSP00000320935	9606.ENSP00000262462	0	0	0	0	0.054	0	0	0.58	0.585
SLC2A4	PLIN1	4439402	4437623	9606.ENSP00000320935	9606.ENSP00000300055	0	0	0	0	0.062	0	0	0.573	0.582
ADIPOQ	OLR1	4447630	4438475	9606.ENSP00000389814	9606.ENSP00000309124	0	0	0	0	0	0	0	0.569	0.569
MMP1	PPARG	4439553	4436745	9606.ENSP00000322788	9606.ENSP00000287820	0	0	0	0	0	0	0	0.567	0.567
GPX3	PPARG	4445798	4436745	9606.ENSP00000373477	9606.ENSP00000287820	0	0	0	0	0	0.05	0	0.541	0.545
SLC27A6	LIPE	4435090	4433889	9606.ENSP00000262462	9606.ENSP00000244289	0	0	0	0	0	0	0	0.544	0.544
EPHX2	MGLL	4449539	4435543	9606.ENSP00000430269	9606.ENSP00000265052	0.297	0	0	0	0.061	0	0	0.358	0.539
PLIN1	AQP7	4437623	4437450	9606.ENSP00000300055	9606.ENSP00000297988	0	0	0	0	0.154	0	0	0.474	0.536
OLR1	PCSK9	4438475	4437942	9606.ENSP00000309124	9606.ENSP00000303208	0	0	0	0	0	0	0	0.535	0.535
CAB39L	ACOT7	4451413	4444958	9606.ENSP00000479669	9606.ENSP00000367086	0	0	0	0	0	0.534	0	0	0.534
HMGCS2	TM7SF2	4443311	4436343	9606.ENSP00000358414	9606.ENSP00000279263	0	0	0	0	0.117	0	0	0.491	0.532
PCSK9	PPARG	4437942	4436745	9606.ENSP00000303208	9606.ENSP00000287820	0	0	0	0	0	0.081	0	0.509	0.529
SLC2A1	PPARG	4448824	4436745	9606.ENSP00000416293	9606.ENSP00000287820	0	0	0	0	0	0	0	0.527	0.527
APOC2	SCARB1	4450821	4434927	9606.ENSP00000466775	9606.ENSP00000261693	0	0	0	0	0.058	0	0	0.517	0.525
CH25H	TM7SF2	4443826	4436343	9606.ENSP00000360918	9606.ENSP00000279263	0	0	0	0	0.112	0.313	0	0.283	0.524
SLC2A1	ADIPOQ	4448824	4447630	9606.ENSP00000416293	9606.ENSP00000389814	0	0	0	0	0.055	0	0	0.516	0.523
SCARB1	LIPE	4434927	4433889	9606.ENSP00000261693	9606.ENSP00000244289	0	0	0	0	0.049	0	0	0.517	0.521
ADIPOQ	PCSK9	4447630	4437942	9606.ENSP00000389814	9606.ENSP00000303208	0	0	0	0	0	0	0	0.516	0.516
PCSK9	SCARB1	4437942	4434927	9606.ENSP00000303208	9606.ENSP00000261693	0	0	0	0	0.06	0	0	0.501	0.511
APOC2	GPD1	4450821	4437724	9606.ENSP00000466775	9606.ENSP00000301149	0	0	0	0	0.091	0	0	0.483	0.51
CH25H	HMGCS2	4443826	4443311	9606.ENSP00000360918	9606.ENSP00000358414	0	0	0	0	0.172	0.05	0	0.425	0.508
PPARG	SLC27A6	4436745	4435090	9606.ENSP00000287820	9606.ENSP00000262462	0	0	0	0	0	0	0	0.493	0.493
PPT1	MGLL	4447869	4435543	9606.ENSP00000394863	9606.ENSP00000265052	0.147	0	0	0	0	0	0	0.424	0.488
PLIN1	SLC27A6	4437623	4435090	9606.ENSP00000300055	9606.ENSP00000262462	0	0	0	0	0.063	0	0	0.473	0.485
GPD1	AQP7	4437724	4437450	9606.ENSP00000301149	9606.ENSP00000297988	0	0	0	0	0.187	0.158	0	0.297	0.477
CYP2E1	GPX7	4449959	4442517	9606.ENSP00000440689	9606.ENSP00000354677	0	0	0	0	0	0	0	0.476	0.476
CYP2E1	ADIPOQ	4449959	4447630	9606.ENSP00000440689	9606.ENSP00000389814	0	0	0	0	0.13	0	0	0.41	0.465
AQP7	LIPE	4437450	4433889	9606.ENSP00000297988	9606.ENSP00000244289	0.046	0	0	0	0.085	0	0	0.43	0.459
SLC27A6	GLA	4435090	4433054	9606.ENSP00000262462	9606.ENSP00000218516	0	0	0	0	0.062	0	0	0.442	0.454
CYP2E1	GPX8	4449959	4449266	9606.ENSP00000440689	9606.ENSP00000423822	0	0	0	0	0	0	0	0.451	0.451
HSD17B6	ADIPOQ	4450358	4447630	9606.ENSP00000451406	9606.ENSP00000389814	0	0	0	0	0	0	0	0.45	0.45
SLC16A1	ACOT7	4449975	4444958	9606.ENSP00000441065	9606.ENSP00000367086	0	0	0	0	0.061	0	0	0.43	0.442
SCD5	SQLE	4439049	4435659	9606.ENSP00000316329	9606.ENSP00000265896	0	0	0	0	0.064	0	0	0.426	0.44
PLIN5	SLC27A6	4445607	4435090	9606.ENSP00000371272	9606.ENSP00000262462	0	0	0	0	0.061	0	0	0.427	0.438
SCD5	LPCAT1	4439049	4436543	9606.ENSP00000316329	9606.ENSP00000283415	0	0	0	0	0.061	0.131	0	0.363	0.435
PLA2G16	PPARG	4439356	4436745	9606.ENSP00000320337	9606.ENSP00000287820	0	0	0	0	0	0	0	0.435	0.435
CYP2E1	CYP3A5	4449959	4433259	9606.ENSP00000440689	9606.ENSP00000222982	0	0	0.441	0.612	0.061	0	0	0.733	0.433
HSD17B6	SCARB1	4450358	4434927	9606.ENSP00000451406	9606.ENSP00000261693	0	0	0	0	0.051	0	0	0.428	0.433
FABP3	SLC2A4	4444252	4439402	9606.ENSP00000362817	9606.ENSP00000320935	0	0	0	0	0.062	0	0	0.419	0.431
HSD17B6	PPARG	4450358	4436745	9606.ENSP00000451406	9606.ENSP00000287820	0	0	0	0	0	0.05	0	0.424	0.429
PLIN4	MGLL	4437742	4435543	9606.ENSP00000301286	9606.ENSP00000265052	0	0	0	0	0.061	0	0	0.41	0.422
ADIPOQ	SLC27A6	4447630	4435090	9606.ENSP00000389814	9606.ENSP00000262462	0	0	0	0	0	0	0	0.423	0.422
SLC2A1	LIPE	4448824	4433889	9606.ENSP00000416293	9606.ENSP00000244289	0	0	0	0	0.055	0	0	0.413	0.422
PPARG	MGLL	4436745	4435543	9606.ENSP00000287820	9606.ENSP00000265052	0	0	0	0	0	0	0	0.42	0.42
SLC2A1	SLC27A6	4448824	4435090	9606.ENSP00000416293	9606.ENSP00000262462	0	0	0	0	0.054	0	0	0.413	0.42
GPD1	PLIN1	4437724	4437623	9606.ENSP00000301149	9606.ENSP00000300055	0	0	0	0	0.177	0	0	0.324	0.419
PLIN4	SLC27A6	4437742	4435090	9606.ENSP00000301286	9606.ENSP00000262462	0	0	0	0	0	0	0	0.41	0.41
ADH7	GPD1	4449104	4437724	9606.ENSP00000420269	9606.ENSP00000301149	0	0	0	0	0.062	0	0	0.389	0.403
PLIN4	PPARG	4437742	4436745	9606.ENSP00000301286	9606.ENSP00000287820	0	0	0	0	0.063	0	0	0.388	0.402
MGLL	SLC27A6	4435543	4435090	9606.ENSP00000265052	9606.ENSP00000262462	0	0	0	0	0	0.128	0	0.343	0.402
PLIN5	MGLL	4445607	4435543	9606.ENSP00000371272	9606.ENSP00000265052	0	0	0	0	0.061	0	0	0.389	0.401
HSD17B6	LIPE	4450358	4433889	9606.ENSP00000451406	9606.ENSP00000244289	0	0	0	0	0	0	0	0.4	0.4

## Sheet: Module1
Category	Term	Count	%	PValue	Genes	List Total	Pop Hits	Pop Total	Fold Enrichment	Bonferroni	Benjamini	FDR
KEGG_PATHWAY	hsa03320:PPAR signaling pathway	5	38.4615	2.5772e-06	PLIN1, PPARG, FABP3, SLC27A6, ADIPOQ	12	67	6879	42.7799	9.27749e-05	9.27749e-05	0.00229865
KEGG_PATHWAY	hsa04152:AMPK signaling pathway	4	30.7692	0.000828889	SLC2A4, PPARG, ADIPOQ, LIPE	12	123	6879	18.6423	0.0294112	0.0148154	0.736888
KEGG_PATHWAY	hsa04923:Regulation of lipolysis in adipocytes	3	23.0769	0.00341552	PLIN1, MGLL, LIPE	12	56	6879	30.7098	0.115886	0.040225	3.00552
KEGG_PATHWAY	hsa00590:Arachidonic acid metabolism	3	23.0769	0.00404102	CYP2J2, CYP2E1, ALOX12	12	61	6879	28.1926	0.135645	0.0357869	3.54717
KEGG_PATHWAY	hsa04920:Adipocytokine signaling pathway	3	23.0769	0.0052911	SLC2A4, SLC2A1, ADIPOQ	12	70	6879	24.5679	0.173855	0.0374768	4.62161
KEGG_PATHWAY	hsa04931:Insulin resistance	3	23.0769	0.0122463	SLC2A4, SLC2A1, SLC27A6	12	108	6879	15.9236	0.35827	0.0712646	10.4078
KEGG_PATHWAY	hsa00591:Linoleic acid metabolism	2	15.3846	0.0454401	CYP2J2, CYP2E1	12	29	6879	39.5345	0.812538	0.212718	33.9521
KEGG_PATHWAY	hsa04930:Type II diabetes mellitus	2	15.3846	0.0741848	SLC2A4, ADIPOQ	12	48	6879	23.8854	0.937644	0.293098	49.717

## Sheet: Module2
Category	Term	Count	%	PValue	Genes	List Total	Pop Hits	Pop Total	Fold Enrichment	Bonferroni	Benjamini	FDR
KEGG_PATHWAY	hsa00100:Steroid biosynthesis	3	60	4.80209e-05	TM7SF2, SQLE, DHCR7	5	20	6879	206.37	0.000384103	0.000384103	0.0262865
KEGG_PATHWAY	hsa01130:Biosynthesis of antibiotics	3	60	0.00544427	TM7SF2, HMGCS2, SQLE	5	212	6879	19.4689	0.0427332	0.0215999	2.94442
KEGG_PATHWAY	hsa01100:Metabolic pathways	4	80	0.0192671	TM7SF2, HMGCS2, SQLE, DHCR7	5	1219	6879	4.51452	0.144134	0.0505576	10.1033
